# Supplementary material
Source: HighWire-hosted journal article supplement (https://bmjopen.bmj.com/content/12/8/e053166)
Supplement: inline-supplementary-material-1 [file inline-supplementary-material-1.pdf]

## Appendix Figure 1. Study profile

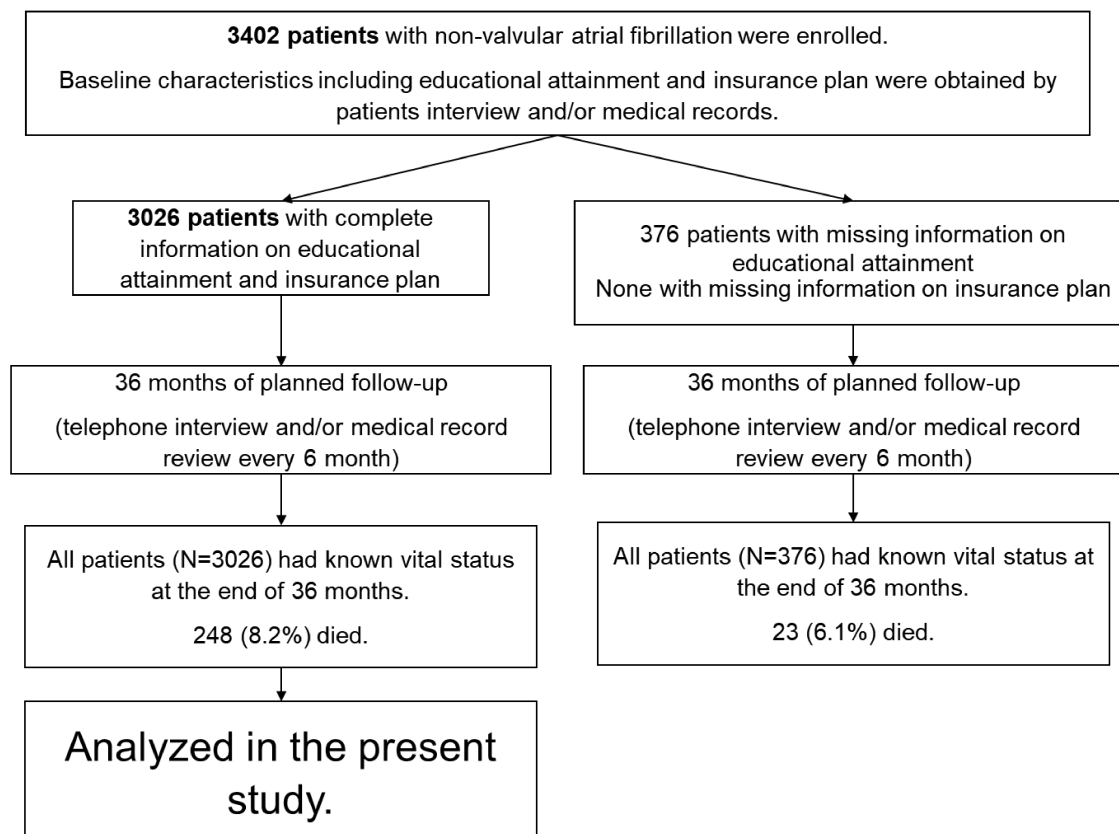

**Appendix Table 1.** Tests for proportional hazard assumption of time to events of interest based on weighted Schoenfeld residuals

| Variables                      | <i>P</i> * value for Events of Interest |                 |                |
|--------------------------------|-----------------------------------------|-----------------|----------------|
|                                | All-cause Mortality                     | Ischemic Stroke | Major Bleeding |
| <b>Educational Attainment</b>  |                                         |                 |                |
| - No formal education          | 0.013                                   | <0.001          | 0.001          |
| - Elementary                   | 0.035                                   | 0.005           | 0.007          |
| - Secondary                    | 0.193                                   | 0.110           | 0.147          |
| - Higher education (reference) | .                                       | .               | .              |
| - Global Test                  | 0.052                                   | 0.003           | 0.005          |
| <b>Insurance Plan</b>          |                                         |                 |                |
| - UHC                          | 0.011                                   | 0.004           | 0.003          |
| - SSS                          | 0.296                                   | 0.442           | 0.326          |
| - NGS                          | 0.381                                   | 0.434           | 0.394          |
| - CSMBS (reference)            | .                                       | .               | .              |
| - Global Test                  | 0.029                                   | 0.015           | 0.012          |

\*A significant *P* value indicates that proportional hazard assumption is violated.

Abbreviations: CSMBS, civil servant medical benefit scheme; NGS, non-government-based scheme; SSS, social-security scheme; UCS, universal coverage scheme.

**Appendix Table 2.** Characters and events rate of patients with missing information (N=376) compared to those who remained in the study (N=3026).

|                                                                | <b>Patients with missing information (N=376)</b> | <b>All patients remained in the study (N=3026)</b> | <b>P</b> |
|----------------------------------------------------------------|--------------------------------------------------|----------------------------------------------------|----------|
| Age, mean (SD), y                                              | 68.0 (11.2)                                      | 67.3 (11.3)                                        | 0.235    |
| Male, No. (%)                                                  | 201 (53.5%)                                      | 1779 (58.8%)                                       | 0.048    |
| CHA <sub>2</sub> DS <sub>2</sub> -VAS <sub>c</sub> , mean (SD) | 3.1 (1.6)                                        | 3.0 (1.7)                                          | 0.162    |
| HASBLED, mean (SD)                                             | 1.5 (1.0)                                        | 1.5 (1.0)                                          | 0.337    |
| Event rate, No. (%)                                            |                                                  |                                                    |          |
| - Death                                                        | 23 (6.1%)                                        | 248 (8.2%)                                         | 0.160    |
| - Ischemic stroke                                              | 8 (2.1%)                                         | 95 (3.1%)                                          | 0.280    |
| - Major bleeding                                               | 16 (4.3%)                                        | 136 (4.5%)                                         | 0.832    |

Abbreviations: CHA<sub>2</sub>DS<sub>2</sub>-VAS<sub>c</sub>, congestive heart failure, hypertension, age ≥ 75 years, diabetes mellitus, stroke or transient ischemic attack (TIA), vascular disease, age 65 to 74 years, sex category; HASBLED, hypertension, abnormal renal/liver function, stroke, bleeding history or predisposition, labile INR, elderly (>65 years), drugs/alcohol concomitantly.

**Appendix Table 3.** Baseline Characteristics by Educational Attainment  
(N=3026)

| Characters                                           | No Formal Education<br>(N=213) | Elementary<br>(N=1526) | Secondary<br>(N=639) | Higher Education<br>(N=648) | P     |
|------------------------------------------------------|--------------------------------|------------------------|----------------------|-----------------------------|-------|
| Age, mean (SD), y                                    | 74.4(10.0)                     | 69.3 (10.2)            | 64.3 (12.1)          | 63.3 (11.1)                 | <.001 |
| Male, No. (%)                                        | 61 (28.6%)                     | 770 (50.5%)            | 476 (74.5%)          | 472 (72.8%)                 | <.001 |
| CHA <sub>2</sub> DS <sub>2</sub> -VASc,<br>mean (SD) | 3.9(1.5)                       | 3.3(1.6)               | 2.7(1.7)             | 2.6(1.7)                    | <.001 |
| HASBLED, mean<br>(SD)                                | 1.7 (0.9)                      | 1.6 (1.0)              | 1.5 (1.0)            | 1.4(1.0)                    | <.001 |
| CAD, No. (%)                                         | 23 (10.8%)                     | 248 (16.3%)            | 99 (15.5%)           | 108 (16.7%)                 | 0.199 |
| CHF, No. (%)                                         | 63 (29.6%)                     | 451 (29.6%)            | 177 (27.7%)          | 138 (21.3%)                 | .001  |
| Hypertension, No.<br>(%)                             | 157 (73.7%)                    | 1061 (69.5%)           | 435 (68.1%)          | 408 (63.0%)                 | .006  |
| Dyslipidemia, No. (%)                                | 92 (43.2%)                     | 831 (54.5%)            | 387 (60.6%)          | 393 (60.6%)                 | <.001 |
| Diabetes, No. (%)                                    | 39 (18.3%)                     | 363 (23.8%)            | 162 (25.4%)          | 166 (25.6%)                 | 0.148 |
| Stroke/TIA, No. (%)                                  | 42 (19.7%)                     | 261 (17.1%)            | 104 (16.3%)          | 123 (19.0%)                 | 0.468 |
| Vascular Disease,<br>No. (%)                         | 26 (12.2%)                     | 263 (17.2%)            | 105 (16.4%)          | 116 (17.9%)                 | 0.258 |
| Current Smoker, No.<br>(%)                           | 3 (1.4%)                       | 52 (3.4%)              | 32 (5.0%)            | 11 (1.7%)                   | .003  |

|                                  |             |              |             |             |                 |
|----------------------------------|-------------|--------------|-------------|-------------|-----------------|
| Alcohol Use, No. (%)             | 1 (0.5%)    | 57 (3.7%)    | 44 (6.9%)   | 27 (4.2%)   | <.001           |
| History of Bleeding, No. (%)     | 20 (9.4%)   | 156 (10.2%)  | 64 (10.0%)  | 64 (9.9%)   | 0.981           |
| Abnormal Renal Function, No. (%) | 5 (2.3%)    | 44 (2.9%)    | 23 (3.6%)   | 18 (2.8%)   | 0.733           |
| Abnormal Liver Function, No. (%) | 4 (1.9%)    | 35 (2.3%)    | 19 (3.0%)   | 9 (1.4%)    | 0.273           |
| Antiplatelets, No. (%)           | 42 (19.7%)  | 420 (27.5%)  | 163 (25.5%) | 177 (27.3%) | 0.094           |
| <b>Anticoagulants</b>            |             |              |             |             | <b>&lt;.001</b> |
| - VKA, No. (%)                   | 179 (84.0%) | 1081 (70.8%) | 427 (66.8%) | 388 (59.9%) |                 |
| - DOAC, No. (%)                  | 3 (1.4%)    | 48 (3.1%)    | 50 (7.8%)   | 81 (12.5%)  |                 |
| - None, No. (%)                  | 31 (14.6%)  | 397 (26.0%)  | 162 (25.4%) | 179 (27.6%) |                 |

Abbreviations: CAD, coronary artery disease; CHA<sub>2</sub>DS<sub>2</sub>-VAS<sub>c</sub>, congestive heart failure, hypertension, age ≥ 75 years, diabetes mellitus, stroke or transient ischemic attack (TIA), vascular disease, age 65 to 74 years, sex category; CHF, congestive heart failure; DOAC, direct oral anticoagulant; HASBLED, hypertension, abnormal renal/liver function, stroke, bleeding history or predisposition, labile INR, elderly (>65 years), drugs/alcohol concomitantly; VKA, vitamin K antagonist.

**Appendix Table 4.** Incidence and Restricted Mean Survival Time of Clinical Outcomes by Educational Attainment

|                                       |                              | <b>No Formal Education</b><br>(N=213) | <b>Elementary</b><br>(N=1526) | <b>Secondary</b><br>(N=639) | <b>Higher Education</b><br>(N=648) | <b>P</b> |
|---------------------------------------|------------------------------|---------------------------------------|-------------------------------|-----------------------------|------------------------------------|----------|
| <b>All-cause Mortality</b><br>(N=248) | <b>Incidence, No. (%)</b>    | 30 (14.1%)                            | 146 (9.6%)                    | 45 (7.0%)                   | 27 (4.2%)                          | <.001    |
|                                       | <b>RMST, months (95% CI)</b> | 31.98 (30.62-33.33)                   | 33.70 (33.32-34.80)           | 34.29 (33.78-34.80)         | 35.02 (34.65-35.40)                | <.001    |
| <b>Ischemic Stroke</b><br>(N=95)      | <b>Incidence, No. (%)</b>    | 14 (6.6%)                             | 55 (3.6%)                     | 14 (2.2%)                   | 12 (1.9%)                          | .002     |
|                                       | <b>RMST, months (95% CI)</b> | 34.15 (33.21-35.10)                   | 35.11 (34.87-35.36)           | 35.46 (35.16-35.75)         | 35.58 (35.32-35.84)                | .004     |
| <b>Major Bleeding</b><br>(N=136)      | <b>Incidence, No. (%)</b>    | 13 (6.1%)                             | 70 (4.6%)                     | 35 (5.5%)                   | 18 (2.8%)                          | 0.066    |
|                                       | <b>RMST, months (95% CI)</b> | 34.18 (33.22-35.14)                   | 34.82 (34.54-35.11)           | 34.72 (34.27-35.17)         | 35.31 (34.98-35.64)                | .03      |

Abbreviations: RMST, restricted mean survival time.

**Appendix Table 5.** Incidence and Restricted Mean Survival Time of Clinical Outcomes by Insurance Plan

|                                    |                              | UHC (N=1333)        | SSS (N=142)         | CSMBS (N=1397)      | NGS (N=154)         | P     |
|------------------------------------|------------------------------|---------------------|---------------------|---------------------|---------------------|-------|
| <b>All-cause Mortality (N=248)</b> | <b>Incidence, No. (%)</b>    | 122 (9.2%)          | 10 (7.0%)           | 100 (7.2%)          | 16 (10.4%)          | 0.183 |
|                                    | <b>RMST, months (95% CI)</b> | 33.61 (33.19-34.03) | 34.52 (33.55-35.50) | 34.32 (33.98-34.66) | 33.95 (32.91-34.99) | .06   |
| <b>Ischemic Stroke (N=95)</b>      | <b>Incidence, No. (%)</b>    | 36 (2.7%)           | 3 (2.1%)            | 51 (3.7%)           | 5 (3.2%)            | 0.468 |
|                                    | <b>RMST, months (95% CI)</b> | 35.27 (35.03-35.51) | 35.64 (35.21-36.07) | 35.17 (34.92-35.41) | 35.14 (34.38-35.90) | .31   |
| <b>Major Bleeding (N=136)</b>      | <b>Incidence, No. (%)</b>    | 65 (4.9%)           | 3 (2.1%)            | 60 (4.3%)           | 8 (5.2%)            | 0.451 |
|                                    | <b>RMST, months (95% CI)</b> | 34.75 (34.43-35.07) | 35.61 (35.07-36.15) | 34.91 (34.62-35.19) | 34.86 (34.02-35.69) | .06   |

Abbreviations: CSMBS, civil servant medical benefit scheme; NGS, non-government-based scheme; RMST, restricted mean survival time; SSS, social-security scheme; UCS, universal coverage scheme.

**Appendix Table 6.** Adjusted\* restricted median survival time (RMST) to ischemic stroke among alive patients by educational attainment and insurance plan.

|                                                      | RMST<br>(months) | 95% CI         | P     |
|------------------------------------------------------|------------------|----------------|-------|
| <b>Insurance Plan (vs. CSMBS)</b>                    |                  |                |       |
| - UHC                                                | 0.18             | -0.16 to 0.52  | 0.290 |
| - SSS                                                | 0.02             | -0.48 to 0.51  | 0.946 |
| - NGS                                                | -0.12            | -0.85 to 0.60  | 0.737 |
| <b>Educational Attainment (vs. higher education)</b> |                  |                |       |
| - No formal education                                | -0.57            | -1.26 to 0.11  | 0.103 |
| - Elementary                                         | -0.45            | -0.79 to -0.10 | 0.011 |
| - Secondary                                          | -0.26            | -0.57 to 0.05  | 0.105 |

\*The model was adjusted for of age, sex, educational attainment, insurance plan, types of anticoagulant, CHA<sub>2</sub>DS<sub>2</sub>VAS<sub>c</sub>, and HASBLED scores.

Abbreviations: CHA<sub>2</sub>DS<sub>2</sub>-VAS<sub>c</sub>, congestive heart failure, hypertension, age ≥ 75 years, diabetes mellitus, stroke or transient ischemic attack (TIA), vascular disease, age 65 to 74 years, sex category; CSMBS, civil servant medical benefit scheme; HASBLED, hypertension, abnormal renal/liver function, stroke, bleeding history or predisposition, labile INR, elderly (>65 years), drugs/alcohol concomitantly; NGS, non-government-based scheme; RMST, restricted median survival time; SSS, social-security scheme; UCS, universal coverage scheme.



**Appendix Table 7.** Adjusted\* restricted median survival time (RMST) to major bleeding among alive patients by educational attainment and insurance plan.

|                                                      | RMST<br>(months) | 95% CI        | P     |
|------------------------------------------------------|------------------|---------------|-------|
| <b>Insurance Plan (vs. CSMBS)</b>                    |                  |               |       |
| - UHC                                                | -0.09            | -0.47 to 0.29 | 0.651 |
| - SSS                                                | 0.04             | -0.59 to 0.65 | 0.912 |
| - NGS                                                | -0.06            | -0.76 to 0.62 | 0.851 |
| <b>Educational Attainment (vs. higher education)</b> |                  |               |       |
| - No formal education                                | -0.46            | -1.35 to 0.43 | 0.315 |
| - Elementary                                         | -0.08            | -0.54 to 0.37 | 0.720 |
| - Secondary                                          | -0.14            | -0.60 to 0.33 | 0.567 |

\*The model was adjusted for of age, sex, educational attainment, insurance plan, types of anticoagulant, CHA<sub>2</sub>DS<sub>2</sub>VAS<sub>c</sub>, and HASBLED scores.

Abbreviations: CHA<sub>2</sub>DS<sub>2</sub>-VAS<sub>c</sub>, congestive heart failure, hypertension, age ≥ 75 years, diabetes mellitus, stroke or transient ischemic attack (TIA), vascular disease, age 65 to 74 years, sex category; CSMBS, civil servant medical benefit scheme; HASBLED, hypertension, abnormal renal/liver function, stroke, bleeding history or predisposition, labile INR, elderly (>65 years), drugs/alcohol concomitantly; NGS, non-government-based scheme; RMST, restricted median survival time; SSS, social-security scheme; UCS, universal coverage scheme.
